# Supplementary material for: CO2-philic moderate selective layer mixed matrix membranes containing surface functionalized NaX towards highly-efficient CO2 capture
Source: Royal Society of Chemistry journal article supplement (doi:10.1039/c9ra01654f), 2019-01-01
Supplement: c9ra01654f1.pdf [file c9ra01654f1.pdf]

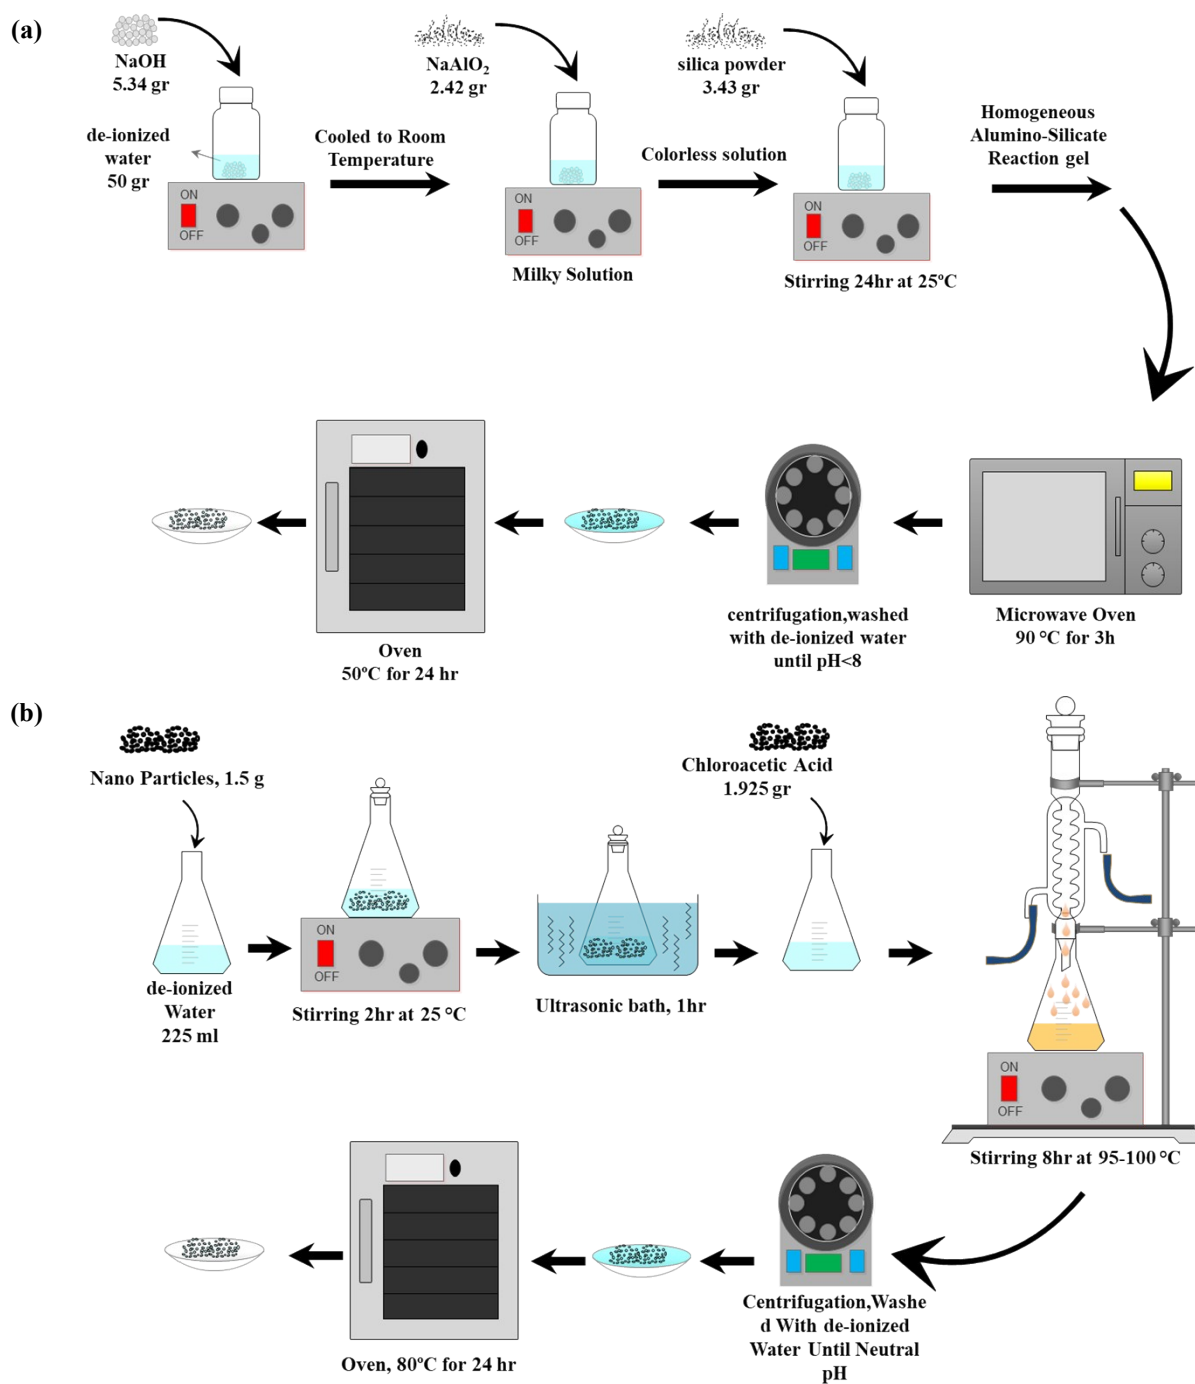

**Fig. S1:** The schematic of steps in the synthesis (a) and functionalization (b) of NaX nano-zeolite.

(a)

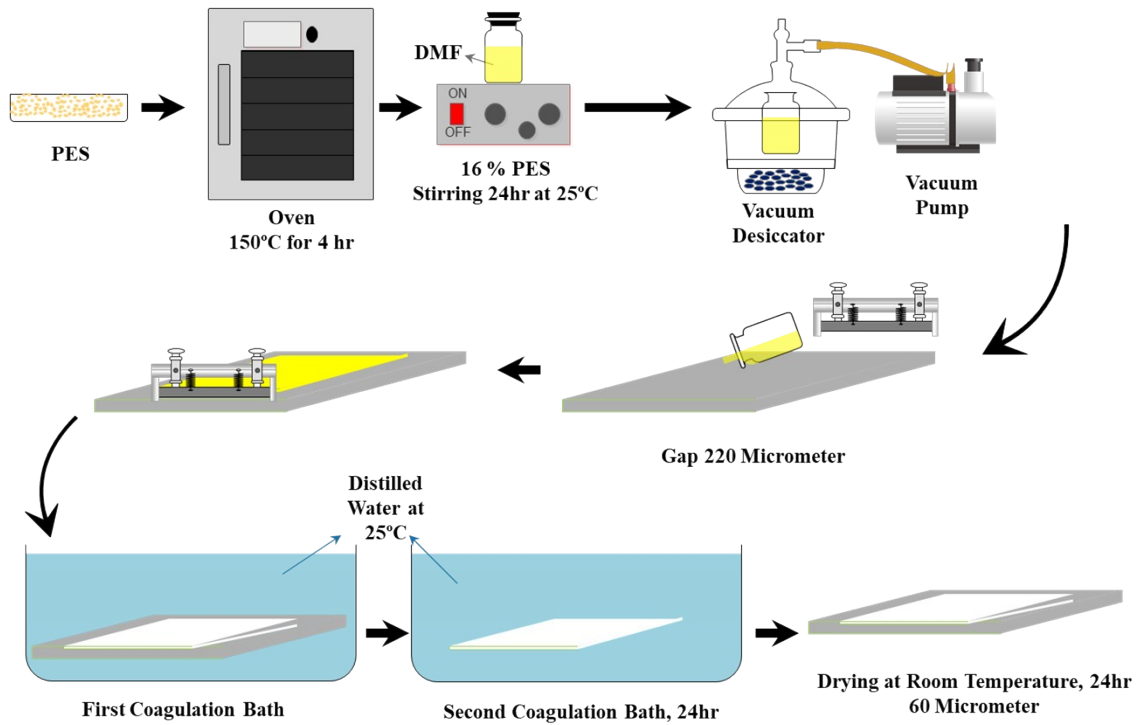

(b)

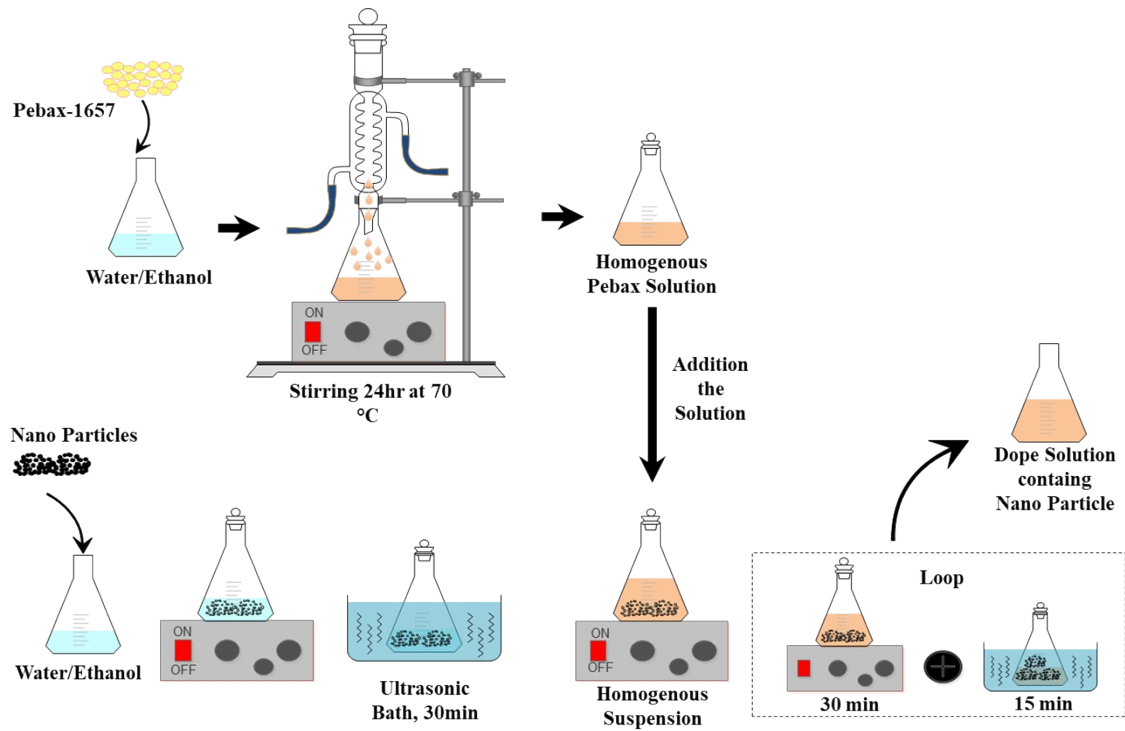

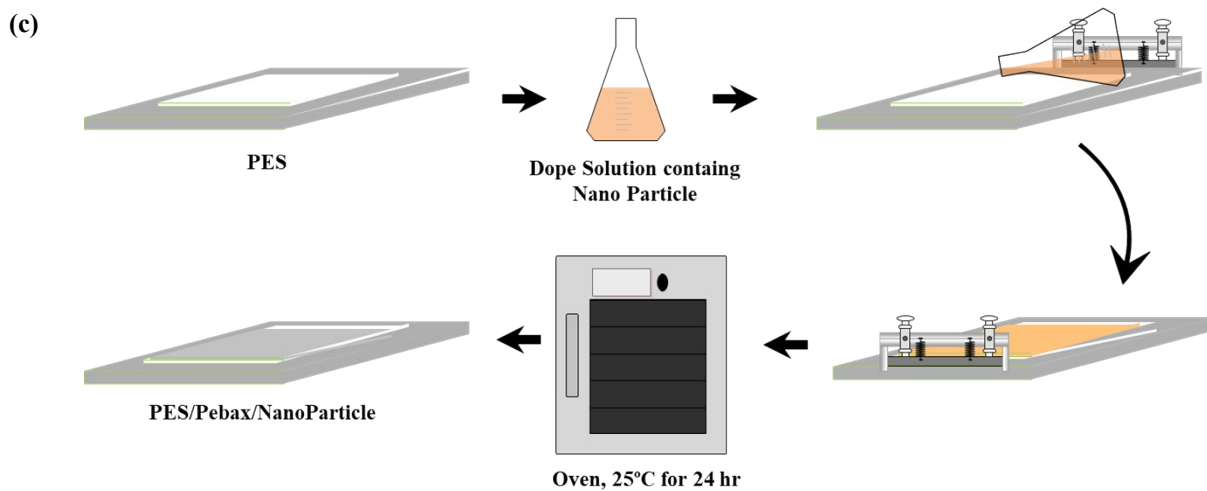

**Fig. S2:** The schematic of the preparation process of PES support layer (a), casting dope solution (b) and MSL-MMMs (c).

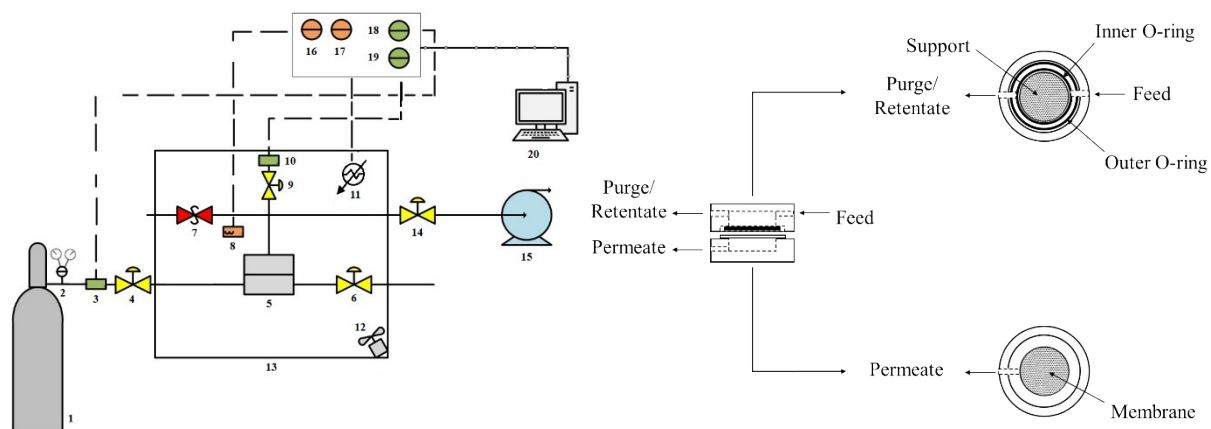

**Fig. S3:** The experimental set-up and membrane module scheme used for single gas permeation process (1. Gas cylinder, 2. Feed pressure regulator, 3. Feed pressure transmitter (accuracy  $\pm 0.1$  bar), 4. Control valve, 5. Membrane module, 6. Control valve (purge flow pressure), 7. Safety valve, 8. Thermometer, 9. Control valve (pressure sensor), 10. Permeate pressure transmitter (accuracy  $\pm 0.01$  mbar), 11. Heater, 12. Fan, 13. Constant temperature chamber, 14. Control valve, 15. Vacuum pump, 16. Temperature indicator, 17. Heater controller, 18. Feed pressure indicator, 19. Permeate pressure indicator and 20. Data recording computer).

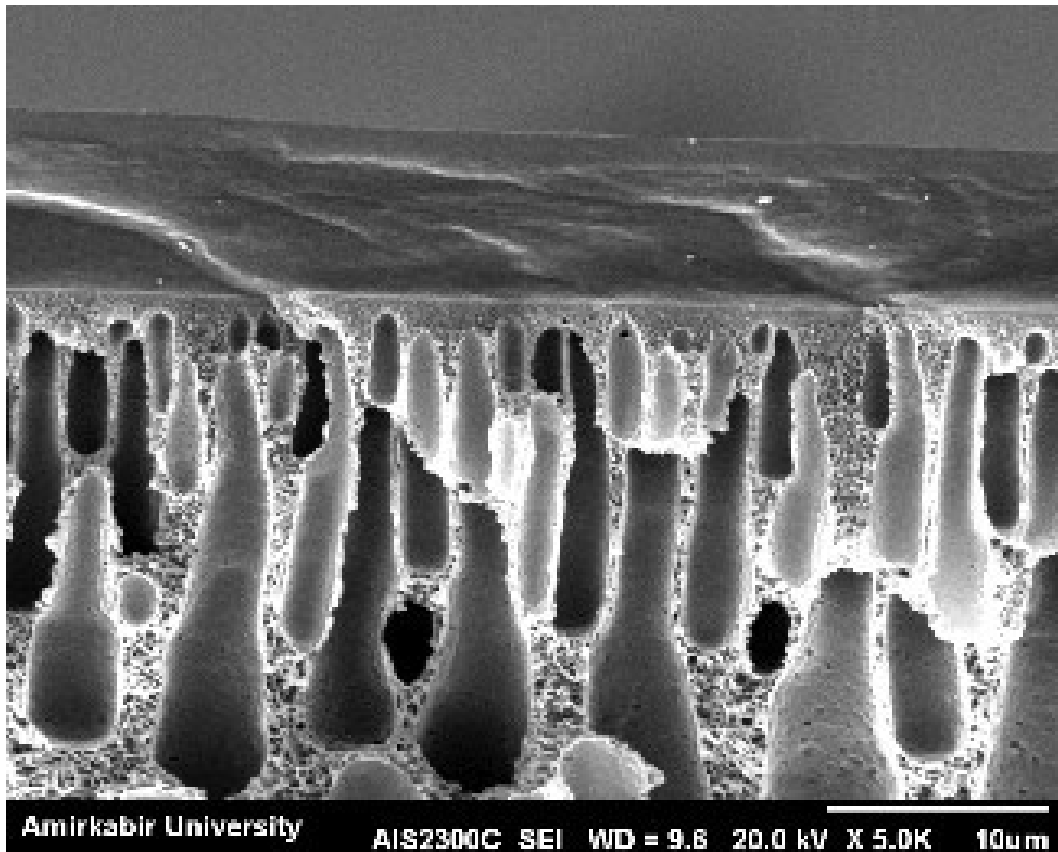

**Fig. S4:** The SEM cross sectional images of the of PP.

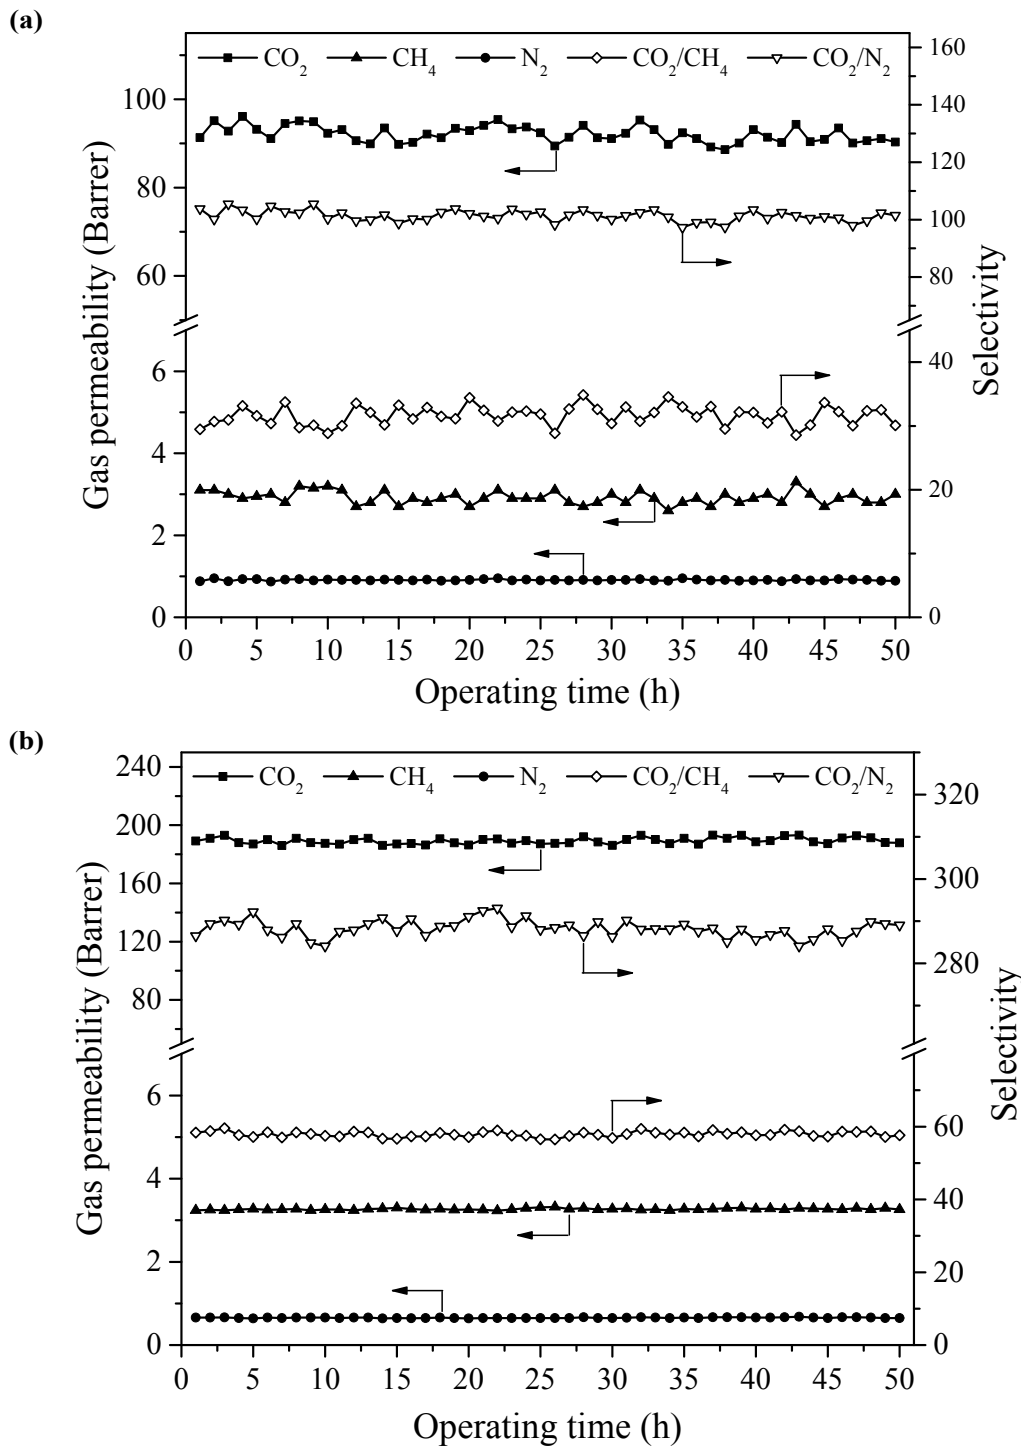

**Fig. S5:** The long-term operation stability for the PPN1.5 (a) and PPNC1.5 (b) at 6 bar and 25 °C.
